# Supplementary material for: White-emitting orthosilicate phosphor α-Sr2SiO4:Ce3+/Eu2+/K+: a bimodal temperature sensor with excellent optical thermometric sensitivity
Source: Royal Society of Chemistry journal article supplement (doi:10.1039/d3dt01689g), 2023-01-01
Supplement: d3dt01689g1.pdf [file d3dt01689g1.pdf]

Electronic Supplementary Information

**White-emitting Orthosilicate Phosphor  $\alpha$ -Sr<sub>2</sub>SiO<sub>4</sub>:Ce<sup>3+</sup>/Eu<sup>2+</sup>/K<sup>+</sup>: a Bimodal  
Temperature Sensor with Excellent Optical Thermometric Sensitivity**

Bin Hui,<sup>a#</sup> Kai Zhao,<sup>a#</sup> Han Si,<sup>a</sup> Xinlin Tong,<sup>b</sup> Xinyi Wu,<sup>a</sup> Li Yin,<sup>a</sup> Saifang Huang<sup>a,\*</sup>

<sup>a</sup> School of Materials Science and Engineering, Jiangsu University of Science and Technology,  
Zhenjiang 212003, P. R. China

<sup>b</sup> School of Materials Science and Engineering, Changzhou University, Changzhou 213164, P. R.  
China

\*Corresponding Author: [s.huang@just.edu.cn](mailto:s.huang@just.edu.cn)

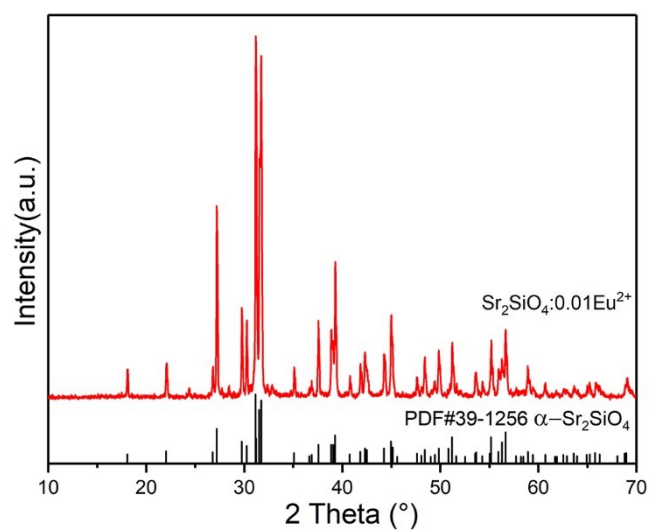

**Figure S1.** XRD patterns of  $\text{Sr}_2\text{SiO}_4:0.01\text{Eu}^{2+}$  after calcination at  $1250^\circ\text{C}$

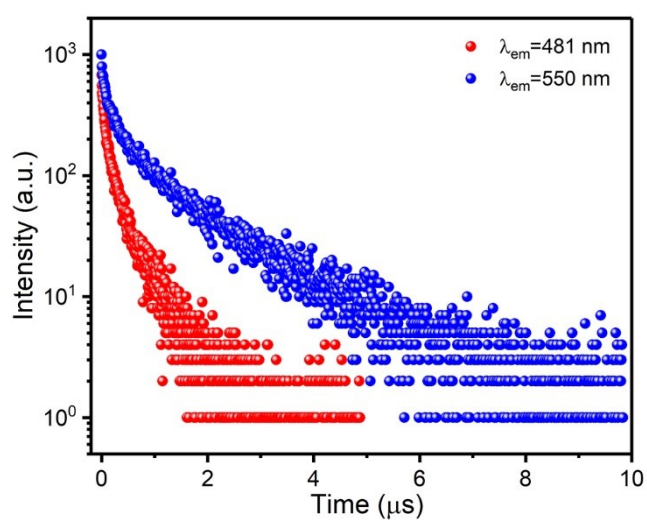

**Figure S2.**  $\text{Sr}_2\text{SiO}_4:0.01\text{Eu}^{2+}$  fluorescence decay curves under excitation at 365 nm and monitoring at 481 nm and 550 nm

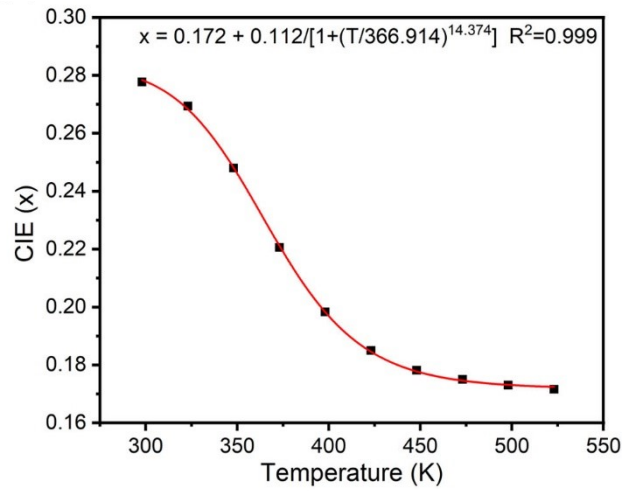

**Figure S3.** The change of chromaticity coordinate  $x$  as the function of temperature  $T$  in Kelvin.

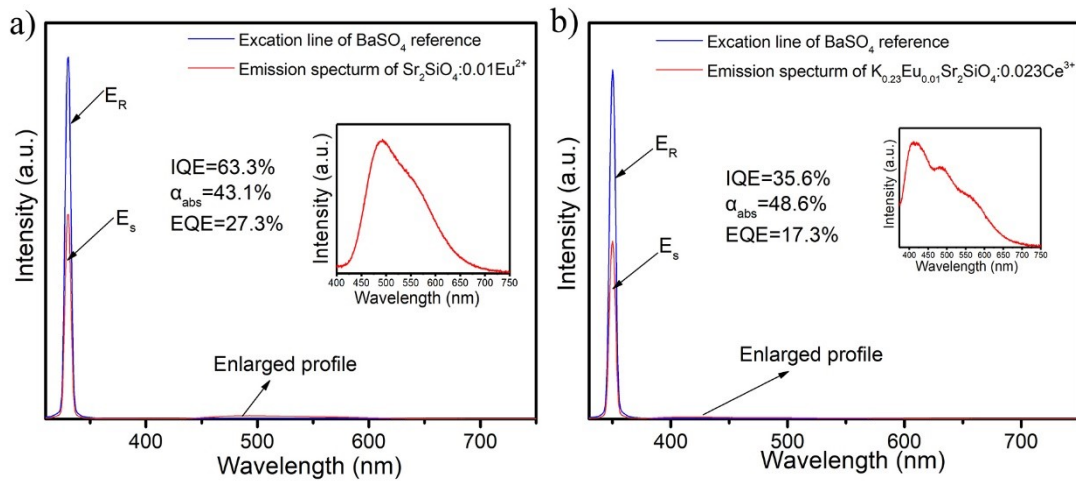

**Figure S4.** a) The quantum efficiency measurement of Sr<sub>2</sub>SiO<sub>4</sub>:0.01Eu<sup>2+</sup> under the excitation of 320 nm; b) The quantum efficiency measurement of Sr<sub>2</sub>SiO<sub>4</sub>:0.01Eu<sup>2+</sup>/0.023Ce<sup>3+</sup>/0.023K<sup>+</sup> under the excitation of 350 nm.

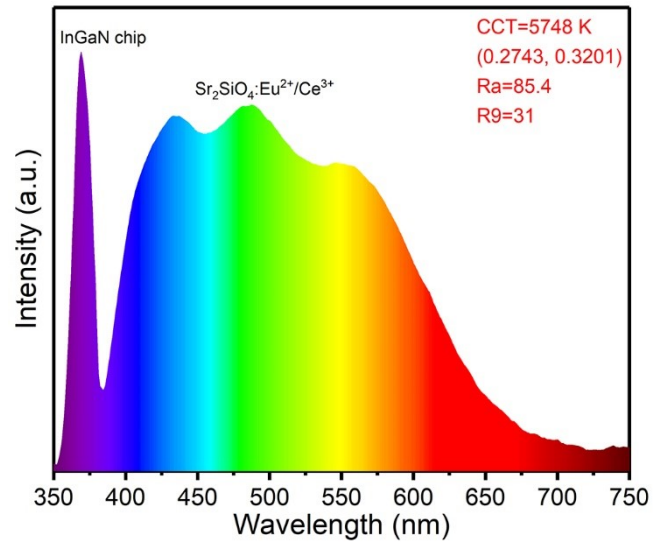

**Figure S5.** The electroluminescence spectrum and optoelectronic properties of the white LED device assembled with the phosphor  $\text{Sr}_2\text{SiO}_4:y\text{Ce}^{3+}/y\text{K}^+/0.01\text{Eu}^{2+}$  ( $y=0.023$ ).

**Table S1.** The fitted lifetime of Sr<sub>2</sub>SiO<sub>4</sub>:0.01Eu<sup>2+</sup>

|                        | 481 nm | 550 nm |
|------------------------|--------|--------|
| $\lambda_{em}$         | 481 nm | 550 nm |
| $y_0$                  | 3.25   | 5.13   |
| A1                     | 604.71 | 566.05 |
| $\tau_1$ ( $\mu$ s)    | 0.0128 | 0.081  |
| A2                     | 334.39 | 303.39 |
| $\tau_2$ ( $\mu$ s)    | 0.206  | 0.964  |
| $\tau_{av}$ ( $\mu$ s) | 0.186  | 0.844  |

**Table S2.** The shift of CIE coordinate of Sr<sub>2</sub>SiO<sub>4</sub>:0.01Eu<sup>2+</sup>/0.023Ce<sup>3+</sup>/0.023K<sup>+</sup> at the temperature range of 298-523K

| Temperature (K) | x      | y      |
|-----------------|--------|--------|
| 298             | 0.2777 | 0.3306 |
| 323             | 0.2694 | 0.3214 |
| 348             | 0.248  | 0.2994 |
| 373             | 0.2206 | 0.2691 |
| 398             | 0.1983 | 0.2434 |
| 423             | 0.185  | 0.2244 |
| 448             | 0.1782 | 0.2096 |
| 473             | 0.175  | 0.1952 |
| 498             | 0.173  | 0.1777 |
| 523             | 0.1716 | 0.1611 |

**Table S3.** Calculated values of  $\Delta E_c$  at different temperature ranges

| Temperature range (K) | $\Delta E_c$ ( $10^{-3}$ ) |
|-----------------------|----------------------------|
| 298-323               | 11                         |
| 298-348               | 41                         |
| 298-373               | 83                         |
| 298-398               | 122                        |
| 298-423               | 150                        |
| 298-448               | 169                        |
| 298-473               | 186                        |
| 298-498               | 207                        |
| 298-523               | 228                        |
